# Supplementary material
Source: ML conference proceedings conference paper supplement (https://openreview.net/forum?id=kM2S8fDTUn)

DXA reports and data processing detail:


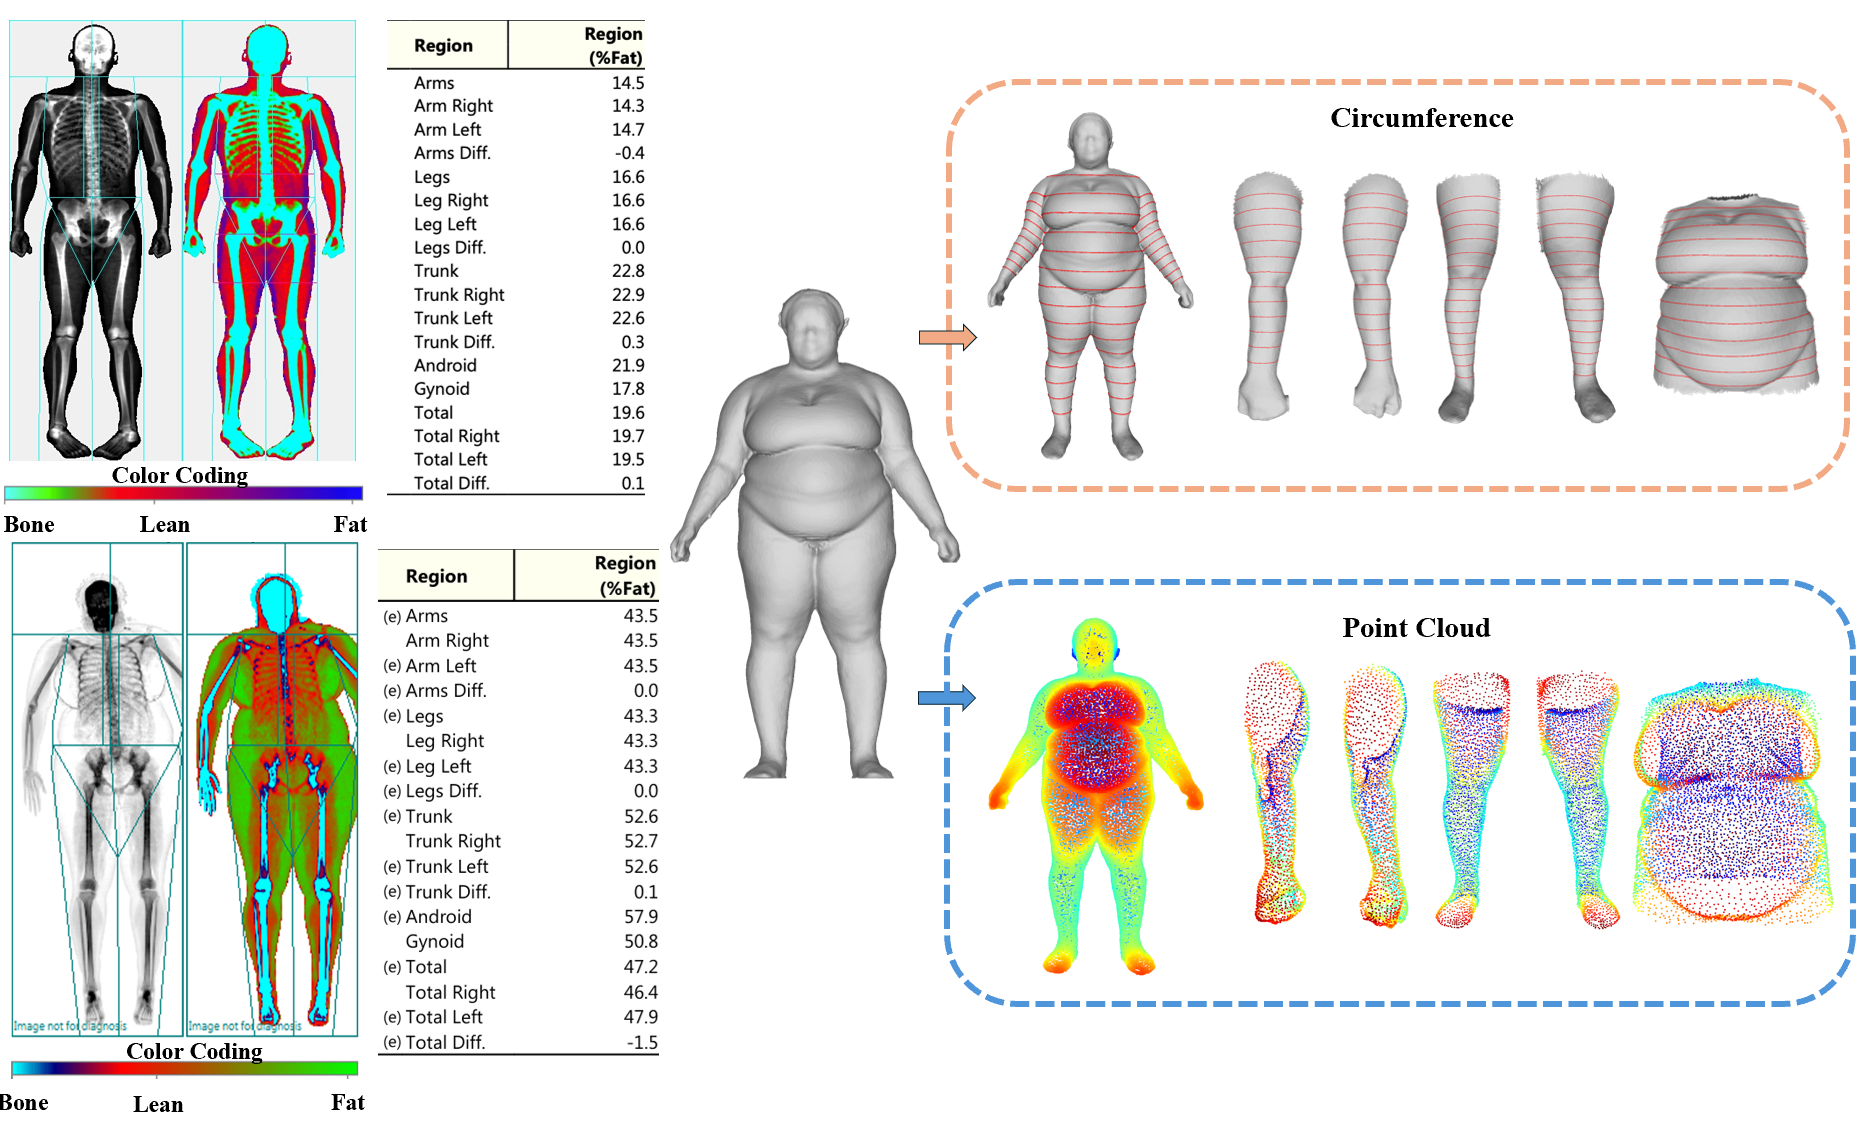

Supplement: supplementary_material [file attachment]
